# Supplementary material for: Cellulose Nanocrystal Surface Cationization: A New Fungicide with High Activity against Phycomycetes capsici
Source: MDPI journal article supplement (doi:10.3390/molecules24132467), 2019-07-04
Supplement: s1 [file s1]

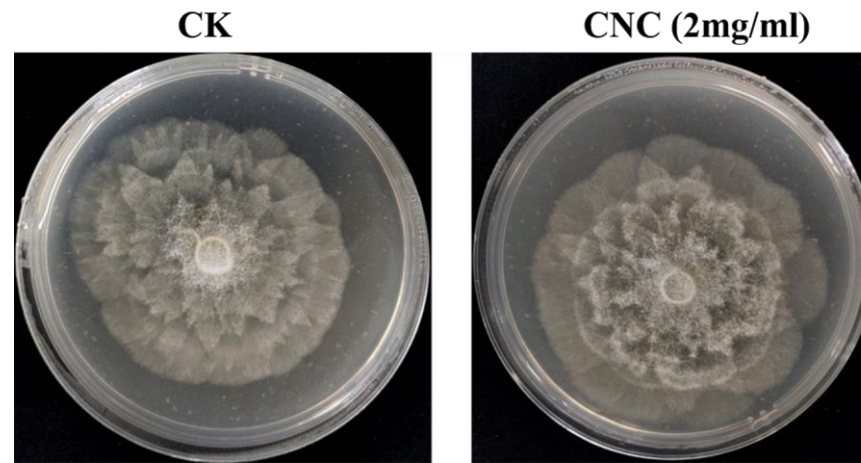

**Figure S-1:** The antifungal activity of cellulose nanocrystal (CNC) against *Phytophthora capsici*. CK is the water group. CNC is the cellulose nanocrystal.

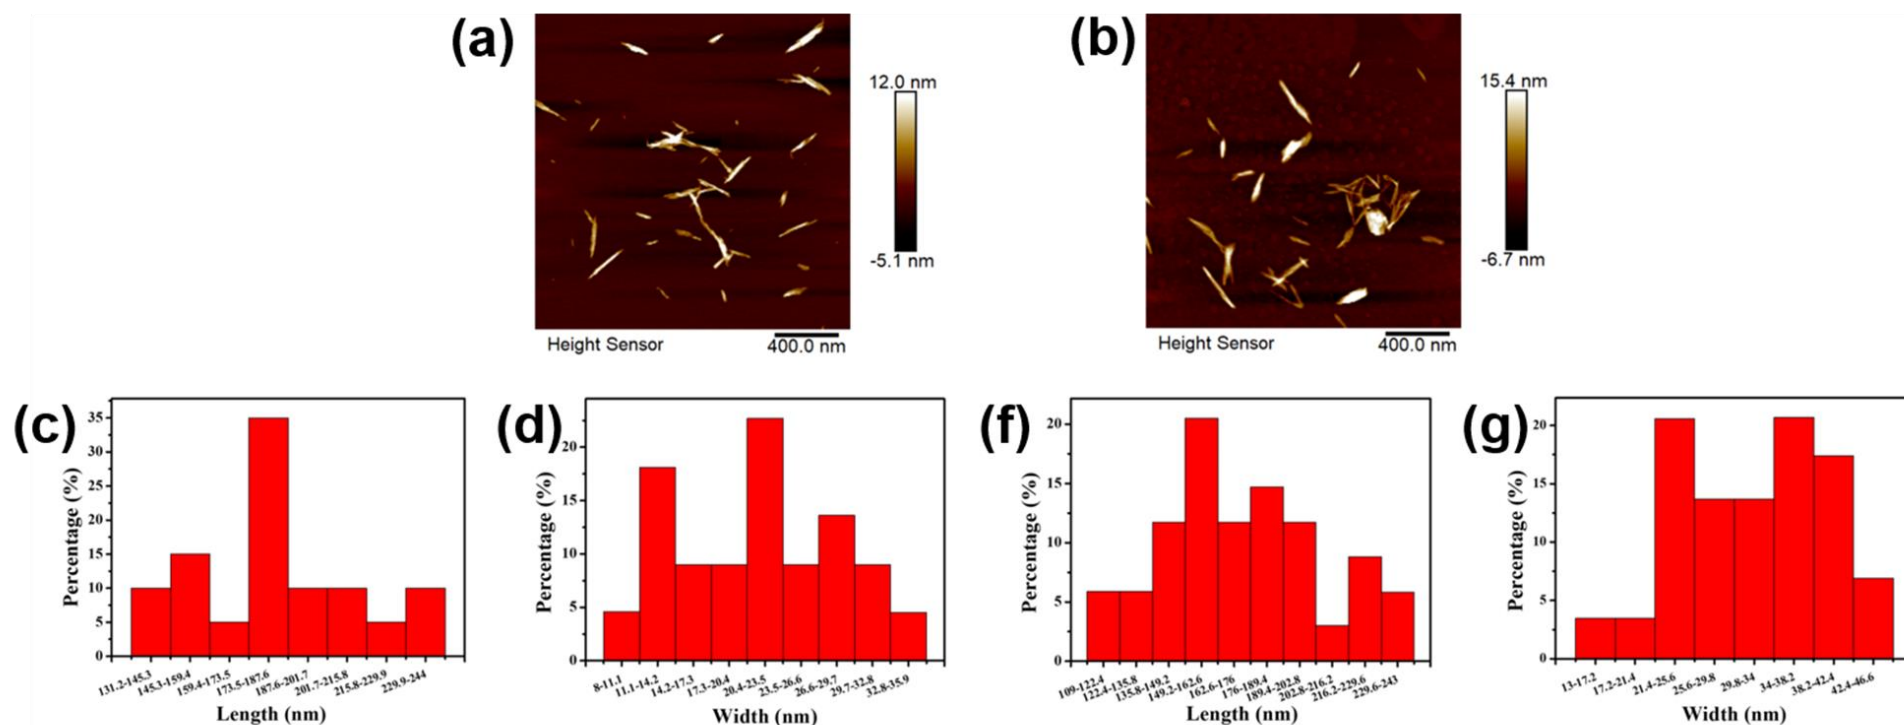

**Figure S-2:** AFM images of CNC (a) and CNC@CTAB (b). CNC length (c) and width (d) statistics. CNC@CTAB length (e) and width (f) statistics. CNC is the cellulose nanocrystal. CNC@CTAB is a material formed by the CTAB and CNC.
